# Supplementary material for: Exploring and conserving genetic resources of corn salad: distribution and collecting of wild Valerianella spp. species in Poland
Source: Research Square preprint supplement (doi:10.21203/rs.3.rs-8397525/v1), 2026-01-08
Supplement: Supplementary file 1 [file 60f07982955ee0e380020efd.xlsx]

## Sheet: Suppl. Table 1
Supplementary Table 1: Valerianella species with taxonomic status as documented in Plants of the World Online.
Valerianella species	Taxonomic status
V. abyssinica Fresen.	Valerianella abyssinica Fresen.
V. adylovii M.N.Abdull.	Valerianella adylovii M.N.Abdull.
V. affinis Balf.f.	Valeriana extincta Christenh. & Byng
V. aksaensis M.N.Abdull.	Valeriana tuberculata (Boiss.) Christenh. & Byng
V. amarella (Lindh. ex Engelm.) Krok	Valeriana amarella (Lindh. ex Engelm.) Christenh. & Byng
V. ambigua Lange ex Krok	Valerianella abyssinica Fresen.
V. amblyotis Fisch. & C.A.Mey. ex Hohen.	Valerianella amblyotis Fisch. & C.A.Mey. ex Hohen.
V. angulosa DC. ex W.H.Baxter	Unplaced name
V. anodon Lincz.	Valeriana oxyrhyncha (Fisch. & C.A.Mey.) Christenh. & Byng
V. anomala A.Gray	Valeriana brachystemon (Fisch. & C.A.Mey.) Byng & Christenh.
V. antilibanotica Rech.f.	Valerianella antilibanotica Rech.f.
V. aphanoptera A.Gray	Valeriana aphanoptera (A.Gray) Byng & Christenh.
V. aralocaspia Lipsky	Unplaced name
V. aucheri Boiss.	Valeriana szovitsiana (Fisch. & C.A.Mey.) Christenh. & Byng
V. auricula DC.	Valeriana dentata (L.) All.
V. balansae V.A.Matthews	Valerianella balansae V.A.Matthews
V. bessarabica Lipsky	Valeriana rimosa (Bastard) Christenh. & Byng
V. boissieri Krok	Valerianella chlorostephana Boiss. & Balansa
V. brachystephana (Ten.) Bertol.	Valeriana pumila (L.) Willd.
V. bracteata Lowe	Valerianella abyssinica Fresen.
V. bulgarica Velen.	Valeriana pontica (Lipsky) Christenh. & Byng
V. bushii Dyal	Valeriana ozarkana (Dyal) Christenh. & Byng
V. caerulea Eaton & Wright	Valeriana locusta L.
V. calcarata Steven ex Krok	Valeriana sclerocarpa (Fisch. & C.A.Mey.) Christenh. & Byng
V. campanulata Biv.	Valeriana eriocarpa (Desv.) Christenh. & Byng
V. capitata Boiss. & Balansa	Valeriana pleurota Christenh. & Byng
V. carinata Loisel.	Valeriana carinata (Loisel.) Christenh. & Byng
V. caucasica (Boiss.) Höck	Valeriana caucasica (Boiss.) Christenh. & Byng
V. chenopodiifolia (Pursh) DC.	Valeriana chenopodiifolia (Pursh) Christenh. & Byng
V. chlorodonta Coss. & Durieu	Valerianella chlorodonta Coss. & Durieu
V. chlorostephana Boiss. & Balansa	Valerianella chlorostephana Boiss. & Balansa
V. chlorostephana Pomel	Valerianella pomelii Batt.
V. ciliosa Greene	Valeriana ciliosa (Greene) Byng & Christenh.
V. columnae Bubani	Valeriana coronata (L.) Mill.
V. congesta Lindl.	Valeriana congesta (Lindl.) Byng & Christenh.
V. conjungens Bunge ex Boiss.	Valeriana orientalis (DC.) Sennikov
V. corniculata C.A.Mey.	Valerianella corniculata C.A.Mey.
V. cornucopiae (L.) Loisel.	Valeriana cornucopiae L.
V. coronata (L.) DC.	Valeriana coronata (L.) Mill.
V. corymbifera Boiss.	Valeriana carinata (Loisel.) Christenh. & Byng
V. costata (Steven) Betcke	Valeriana pleurota Christenh. & Byng
V. cucullata Dufour ex Krok	Valeriana eriocarpa (Desv.) Christenh. & Byng
V. cupulifera Le Grand	Valeriana pumila (L.) Willd.
V. cymbaecarpa C.A.Mey.	Valeriana cymbaecarpa (C.A.Mey.) Sennikov
V. dactylophylla Boiss. & Hohen.	Valeriana dactylophylla (Boiss. & Hohen.) Sennikov
V. dasycarpa (Steven) Link	Valeriana dentata (L.) All.
V. dentata (L.) Pollich	Valeriana dentata (L.) All.
V. deserticola Hadač	Valerianella deserticola Hadač
V. dichotoma Gilib.	Valeriana locusta L.
V. diodon Boiss.	Valeriana oxyrhyncha (Fisch. & C.A.Mey.) Christenh. & Byng
V. diplusodon Boiss.	Valeriana oxyrhyncha (Fisch. & C.A.Mey.) Christenh. & Byng
V. discoidea (L.) Loisel.	Valeriana discoidea (L.) Willd.
V. divaricata Lange	Valeriana langei Christenh. & Byng
V. dufresnia Bunge ex Boiss.	Valeriana orientalis (DC.) Sennikov
V. echinata (L.) DC.	Valeriana echinata L.
V. eriocarpa Desv.	Valeriana eriocarpa (Desv.) Christenh. & Byng
V. eriocarpa Krok ex Grossh.	Valeriana muricata (Steven ex Roem. & Schult.) Sennikov
V. eriocephala Hampe	Valeriana aegaea Christenh. & Byng
V. euxina Velen.	Valeriana pontica (Lipsky) Christenh. & Byng
V. exscapa Steven	Hohenackeria exscapa (Steven) Grande
V. fagopyrum Walp.	Valeriana chenopodiifolia (Pursh) Christenh. & Byng
V. falconida Shvedtsch.	Valerianella falconida Shvedtsch.
V. fallax Coss. & Durieu ex Coss.	Valerianella abyssinica Fresen.
V. florifera Shinners	Valeriana florifera (Shinners) Christenh. & Byng
V. fusiformis Pau	Unplaced name
V. gibosa (Guss.) Tineo	Valeriana pleurota Christenh. & Byng
V. gioelbaschiensis Stapf	Unplaced name
V. glomerata Boiss. & Balansa	Valerianella glomerata Boiss. & Balansa
V. godayana Fanlo	Valeriana dentata (L.) All.
V. gonocarpa Gand.	Unplaced name
V. gracilis Haberle ex Heynh.	Unplaced name
V. gracilis Fisch. & C.A.Mey.	Valeriana pumila (L.) Willd.
V. grayi (Suksd.) Piper	Unplaced name
V. hamata DC.	Valeriana coronata (L.) Mill.
V. heterocarpa Bisch.	Valeriana pumila (L.) Willd.
V. hirsutissima Link	Valeriana aegaea Christenh. & Byng
V. hispidiuscula Mérat	Valeriana dentata (L.) All.
V. huetii Boiss.	Valeriana cymbaecarpa (C.A.Mey.) Sennikov
V. ibizae Sennen & Elías	Valeriana muricata (Steven ex Roem. & Schult.) Sennikov
V. incrassata Nyman	Valeriana eriocarpa (Desv.) Christenh. & Byng
V. intermedia Dyal	Valeriana umbilicata (Sull.) Christenh. & Byng
V. istriaca Gand.	Unplaced name
V. kotschyi Boiss.	Valeriana kotschyi (Boiss.) Christenh. & Byng
V. kulabensis Lipsky ex Lincz.	Valerianella kulabensis Lipsky ex Lincz.
V. lasiocarpa (Steven) ex Betcke	Valeriana lanata Christenh. & Byng
V. lasiocephala Steven ex Betcke	Valeriana coronata (L.) Mill.
V. laticuspis Bertol.	Valeriana pumila (L.) Willd.
V. laxa (Hook. & Arn.) C.Presl	Valeriana laxiflora DC.
V. laxa Boiss. & Balansa	Valerianella balansae V.A.Matthews
V. laxiflora Dufr.	Valeriana rimosa (Bastard) Christenh. & Byng
V. leiocarpa (K.Koch) Kuntze	Valeriana orientalis (DC.) Sennikov
V. leptocarpa Pomel	Valerianella leptocarpa Pomel
V. lingulata C.Presl	Valeriana dentata (L.) All.
V. lipskyi Lincz.	Valerianella amblyotis Fisch. & C.A.Mey. ex Hohen.
V. locusta (L.) Laterr.	Valeriana locusta L.
V. longiflora (Torr. & A.Gray) Walp.	Valeriana matheziana Christenh. & Byng
V. longiflora Regel & Schmalh.	Valeriana fedtschenkoi Coincy
V. lusitanica Pau ex Font Quer	Valeriana locusta L.
V. lutea Moench	Patrinia sibirica (L.) Juss.
V. macrocera (Torr. & A.Gray) A.Gray	Valeriana macrocera (Torr. & A.Gray) Byng & Christenh.
V. macrocyathus Pomel	Valeriana eriocarpa (Desv.) Christenh. & Byng
V. macroptera (Suksd.) Piper	Valeriana macrocera (Torr. & A.Gray) Byng & Christenh.
V. magna Greene	Valeriana brachystemon (Fisch. & C.A.Mey.) Byng & Christenh.
V. mamillata (Suksd.) Piper	Unplaced name
V. martini Loscos	Valeriana martini (Losco) Christenh. & Byng
V. membranacea Loisel.	Valeriana pumila (L.) Willd.
V. microcarpa Loisel.	Valerianella abyssinica Fresen.
V. microcephala Krok	Valeriana langei Christenh. & Byng
V. microcyathus Pomel	Valeriana eriocarpa (Desv.) Christenh. & Byng
V. microdonta Sennen & Mauricio	Valerianella chlorodonta Coss. & Durieu
V. microstephana Boiss. & Balansa	Valeriana lanata Christenh. & Byng
V. mixta (L.) Dufr.	Valerianella abyssinica Fresen.
V. monodon K.Koch	Valeriana cymbaecarpa (C.A.Mey.) Sennikov
V. morisonii (Spreng.) DC.	Valeriana dentata (L.) All.
V. multidentata Loscos & J.Pardo	Valerianella multidentata Loscos & J.Pardo
V. muricata (Steven ex Roem. & Schult.) W.H.Baxter	Valeriana muricata (Steven ex Roem. & Schult.) Sennikov
V. mutica A.Kern.	Valeriana pumila (L.) Willd.
V. nuttallii (Torr. & A.Gray) Walp.	Unplaced name
V. obtusiloba Boiss.	Valeriana obtusiloba (Boiss.) Christenh. & Byng
V. olitoria (L.) Pollich	Valeriana locusta L.
V. orientalis (Schltdl.) Boiss. & Balansa	Valerianella orientalis (Schltdl.) Boiss. & Balansa
V. otodonta Pomel	Valeriana dentata (L.) All.
V. ovczinnikovii Sharipova	Valerianella ovczinnikovii Sharipova
V. oxyrhyncha Fisch. & C.A.Mey.	Valeriana oxyrhyncha (Fisch. & C.A.Mey.) Christenh. & Byng
V. ozarkana Dyal	Valeriana ozarkana (Dyal) Christenh. & Byng
V. palmeri Dyal	Valeriana arkansana Christenh. & Byng
V. parviflora Douglas ex Torr. & A.Gray	Valeriana congesta (Lindl.) Byng & Christenh.
V. patellaria (Sull. Ex A.Gray) Alph.Wood	Valeriana umbilicata (Sull.) Christenh. & Byng
V. persica Boiss.	Valeriana szovitsiana (Fisch. & C.A.Mey.) Christenh. & Byng
V. petrophila (Bunge) Krok	Valeriana petrophila Bunge
V. petrovichii Asch.	Valerianella petrovichii Asch.
V. plagiocyathus Pomel	Valeriana eriocarpa (Desv.) Christenh. & Byng
V. plagiostephana Fisch. & C.A.Mey.	Valeriana plagiostephana (Fisch. & C.A.Mey.) Christenh. & Byng
V. platycarpa Trautv.	Valerianella platycarpa Trautv.
V. platyloba Dufr.	Valeriana discoidea (L.) Willd.
V. pomelii Batt.	Valerianella pomelii Batt.
V. pontica Lipsky	Valeriana pontica (Lipsky) Christenh. & Byng
V. praecox Willk.	Valeriana carinata (Loisel.) Christenh. & Byng
V. pteroloba Steud.	Valeriana oxyrhyncha (Fisch. & C.A.Mey.) Christenh. & Byng
V. pterophila (Bunge) Steud.	Valeriana petrophila Bunge
V. puberula (Bertol. ex Guss) DC.	Valeriana ibika Christenh. & Byng
V. pubescens Krok	Valeriana uncinata M.Bieb.
V. pubescens Mérat	Valeriana dentata (L.) All.
V. pulchella Fisch. ex Krok	Valeriana pumila (L.) Willd.
V. pumila (L.) DC.	Valeriana pumila (L.) Willd.
V. punctata Heynh.	Unplaced name
V. pusilla Miégev.	Valeriana locusta L.
V. quadrangularis Steud.	Valeriana carinata (Loisel.) Christenh. & Byng
V. radiata (L.) Dufr.	Valeriana woodsiana (Torr. & A.Gray) Christenh. & Byng
V. remota Boiss. & Hohen.	Valeriana sclerocarpa (Fisch. & C.A.Mey.) Christenh. & Byng
V. rhombicarpa Aiken ex Torr. & A.Gray	Valeriana locusta L.
V. rimosa Bastard	Valeriana rimosa (Bastard) Christenh. & Byng
V. rotata Roem. & Schult. ex W.H.Baxter	Unplaced name
V. rubens (Suksd.) Piper	Valeriana insignis (Suksd.) Christenh. & Byng
V. rugulosa Fisch.	Valeriana eriocarpa (Desv.) Christenh. & Byng
V. samolifolia (Bertero) A.Gray	Valeriana samolifolia (Bertero) Colla
V. sclerocarpa Fisch. & C.A.Mey.	Valeriana sclerocarpa (Fisch. & C.A.Mey.) Christenh. & Byng
V. sheilii Boiss.	Valeriana pumila (L.) Willd.
V. sicula Link	Valeriana discoidea (L.) Willd.
V. soyeri Buching. ex Boiss.	Valeriana echinata L.
V. sphaerocarpa DC.	Valeriana pumila (L.) Willd.
V. stenocarpa (Engelm.) Krok	Unplaced name
V. stephanodon Coss. & Durieu	Valerianella stephanodon Coss. & Durieu
V. stocksii Boiss.	Valeriana oxyrhyncha (Fisch. & C.A.Mey.) Christenh. & Byng
V. striata Steven	Valeriana locusta L.
V. szovitsiana Fisch. & C.A.Mey.	Valeriana szovitsiana (Fisch. & C.A.Mey.) Christenh. & Byng
V. texana Dyal	Valeriana edwardsensis Christenh. & Byng
V. triceras Bornm.	Valerianella triceras Bornm.
V. tridentata (Steven) Betcke	Valeriana pumila (L.) Willd.
V. tridentata Gasp.	Valeriana pumila (L.) Willd.
V. trigonocarpa DC.	Valeriana turgida (Steven) Christenh. & Byng
V. triplaris Boiss. & Buhse.	Valeriana triplaris (Boiss. & Buhse) Christenh. & Byng
V. triquetra Shuttlew.	Valeriana chenopodiifolia (Pursh) Christenh. & Byng
V. truncata (Rchb.) Betcke	Valeriana muricata (Steven ex Roem. & Schult.) Sennikov
V. tuberculata Boiss.	Valeriana tuberculata (Boiss.) Christenh. & Byng
V. turcica Doğru-Koca & G.Zare	Valerianella turcica Doğru-Koca & G.Zare
V. turgida (Steven) Betcke	Valeriana turgida (Steven) Christenh. & Byng
V. turkestanica Regel & Schmalh.	Valeriana regelii Sennikov
V. umbilicata (Sull.) Alph.Wood	Valeriana umbilicata (Sull.) Christenh. & Byng
V. uncinata (M.Bieb) Dufr.	Valeriana uncinata M.Bieb.
V. varzobica Sharipova	Valerianella varzobica Sharipova
V. vesicaria (L.) Moench	Valeriana vesicaria (L.) Mill.
V. vvedenskyi Lincz.	Valeriana szovitsiana (Fisch. & C.A.Mey.) Christenh. & Byng
V. willkommii Freyn ex Willk.	Valeriana martini (Losco) Christenh. & Byng
V. woodsiana (Torr. & A.Gray) Walp.	Valeriana woodsiana (Torr. & A.Gray) Christenh. & Byng
V. x walliana Maire	Unplaced name
V. x zoltani Borbás	Unplaced name

## Sheet: Suppl. Table 2
Supplementary Table 2: Valerianella species summarized by taxonomic status. Native distribution and number of entries in Genesys are denoted by three-letter ISO country code.
		Native distribution
Taxonomic status	Valerianella species	Europe	Asia	Africa	Americas	Representation Genesys
Hohenackeria exscapa (Steven) Grande	V. exscapa Steven	ESP	ARM; AZE; GEO; IRN; TUR	DZA; MAR
Patrinia sibirica (L.) Juss.	V. lutea Moench		CHN; JAP; KAZ; MNG; RUS
Valeriana aegaea Christenh. & Byng	V. eriocephala Hampe; V. hirsutissima Link	GRC; TUR	TUR
Valeriana amarella (Lindh. ex Engelm.) Christenh. & Byng	V. amarella (Lindh. ex Engelm.) Krok				USA	USA (2)
Valeriana aphanoptera (A.Gray) Byng & Christenh.	V. aphanoptera A.Gray				CAN; USA
Valeriana arkansana Christenh. & Byng	V. palmeri Dyal				USA
Valeriana brachystemon (Fisch. & C.A.Mey.) Byng & Christenh.	V. anomala A.Gray; V. magna Greene				CAN; USA
Valeriana carinata (Loisel.) Christenh. & Byng	V. carinata Loisel.; V. corymbifera Boiss.; V. praecox Willk.; V. quadrangularis Steud.	ALB; AUT; BEL; BGR; BIH; BLR; CHE; CYP; CZE; DEU; ESP; FRA; GRC; HRV; HUN; ITA; LUX; MDA; MKD; MLT; MNE; NLD; POL; PRT; ROU; RUS; SRB; SVK; SVN; TUR; UKR	ARM; AZE; GEO; IRN; IRQ; ISR; JOR; LBN; SYR; TUR	DZA; MAR; TUN		FRA (1); GBR (1); ISR (3); NLD (2)
Valeriana caucasica (Boiss.) Christenh. & Byng	V. caucasica (Boiss.) Höck	RUS	ARM; AZE; GEO
Valeriana chenopodiifolia (Pursh) Christenh. & Byng	V. chenopodiifolia (Pursh) DC.; V. fagopyrum Walp.; V. triquetra Shuttlew.				CAN; USA
Valeriana ciliosa (Greene) Byng & Christenh.	V. ciliosa Greene				MEX; USA
Valeriana congesta (Lindl.) Byng & Christenh.	V. congesta Lindl.; V. parviflora Douglas ex Torr. & A.Gray				CAN; USA	USA (1)
Valeriana cornucopiae L.	V. cornucopiae (L.) Loisel.	ESP; PRT		MAR
Valeriana coronata (L.) Mill.	V. columnae Bubani; V. coronata (L.) DC.; V. hamata DC.; V. lasiocephala Steven ex Betcke	ALB; BGR; BIH; BLR; CYP; CZE; ESP; FRA; GRC; HRV; HUN; ITA; MDA; MKD; MLT; MNE; PRT; ROU; RUS; SRB; SVK; SVN; TUR; UKR	AFG; ARM; AZE; GEO; IRN; IRQ; ISR; JOR; KAZ; KGZ; LBN; PAK; SYR; TJK; TKM; TUR; UZB	DZA; MAR; TUN		ARM (1); ISR (2); JOR (1); ROU (1); unknown (1)
Valeriana cymbaecarpa (C.A.Mey.) Sennikov	V. cymbaecarpa C.A.Mey.; V. huetii Boiss.; V. monodon K.Koch		AFG; ARM; AZE; GEO; IRN; KAZ; KGZ; PAK; TJK; TKM; TUR; UZB
Valeriana dactylophylla (Boiss. & Hohen.) Sennikov	V. dactylophylla Boiss. & Hohen.		IRN; IRQ; KAZ; KGZ; LBN; SYR; TJK; TUR; UZB			ISR (1); LBN (2)
Valeriana dentata (L.) All.	V. auricula DC.; V. dasycarpa (Steven) Link; V. dentata (L.) Pollich; V. godayana Fanlo; V. hispidiuscula Mérat; V. lingulata C.Presl; V. morisonii (Spreng.) DC.; V. otodonta Pomel; V. pubescens Mérat	ALB; AUT; BEL; BGR; BIH; CHE; CZE; DEU; DNK; ESP; FRA; GRC; HRV; HUN; ITA; LUX; MDA; MKD; MLT; MNE; NLD; NOR; POL; ROU; RUS; SRB; SVK; SVN; SWE; TUR; UKR	ARM; AZE; CHN; GEO; IRN; IRQ; PAK; TJK; TUR	DZA; MAR; TUN		CHE (1); DNK (2); GBR (7); NLD (1); POL (1); unknown (1)
Valeriana discoidea (L.) Willd.	V. discoidea (L.) Loisel.; V. platyloba Dufr.; V. sicula Link	BGR; BIH; CYP; ESP; FRA; GRC; HRV; ITA; MKD; MLT; MNE; PRT; SRB; SVN; TUR	IRN; ISR; JOR; LBN; OMN; SAU; SYR; TUR	DZA; EGY; LBY; MAR; TUN		PRT (1)
Valeriana echinata L.	V. echinata (L.) DC.; V. soyeri Buching. ex Boiss.	ALB; BIH; CYP; ESP; FRA; GRC; HRV; ITA; MKD; MLT; MNE; PRT; RUS; SRB; SVN; TUR	IRN; IRQ; ISR; JOR; LBN; SYR; TUR	MAR
Valeriana edwardsensis Christenh. & Byng	V. texana Dyal				USA
Valeriana eriocarpa (Desv.) Christenh. & Byng	V. campanulata Biv.; V. cucullata Dufour ex Krok; V. eriocarpa Desv.; V. incrassata Nyman; V. macrocyathus Pomel; V. microcyathus Pomel; V. plagiocyathus Pomel; V. rugulosa Fisch.	ALB; BEL; BGR; BIH; CHE; DEU; ESP; FRA; GBR; GRC; HRV; ITA; MKD; MLT; MNE; SRB; SVN; TUR	TUR	DZA; LBY; MAR; TUN		FRA (1); GBR (3)
Valeriana extincta Christenh. & Byng	V. affinis Balf.f.		YEM
Valeriana fedtschenkoi Coincy	V. longiflora Regel & Schmalh.		AFG; CHN; KAZ; KGZ; PAK; TKJ; TKM; UZB
Valeriana florifera (Shinners) Christenh. & Byng	V. florifera Shinners				USA
Valeriana ibika Christenh. & Byng	V. puberula (Bertol. ex Guss) DC.	ITA		TUN
Valeriana insignis (Suksd.) Christenh. & Byng	V. rubens (Suksd.) Piper				USA
Valeriana kotschyi (Boiss.) Christenh. & Byng	V. kotschyi Boiss.	BGR; UKR	ARM; AZE; GEO; IRN; IRQ; ISR; LBN; JOR; SYR; TJK; TUR
Valeriana lanata Christenh. & Byng	V. lasiocarpa (Steven) ex Betcke; V. microstephana Boiss. & Balansa	CYP; GRC; BGR; MDA; ROU; RUS; UKR	ARM; AZE; GEO; IRN; IRQ; TUR			GEO (1)
Valeriana langei Christenh. & Byng	V. divaricata Lange; V. microcephala Krok	ESP
Valeriana laxiflora DC.	V. laxa (Hook. & Arn.) C.Presl				ARG; CHL	CHL (1)
Valeriana locusta L.	V. caerulea Eaton & Wright; V. dichotoma Gilib.; V. locusta (L.) Laterr.; V. lusitanica Pau ex Font Quer; V. olitoria (L.) Pollich; V. pusilla Miégev.; V. rhombicarpa Aiken ex Torr. & A.Gray; V. striata Steven	ALB; AUT; BEL; BGR; BIH; BLR; CHE; CZE; DEU; DNK; ESP; EST; FIN; FRA; GBR; GRC; HRV; HUN; IRL; ITA; LTU; LUX; LVA; MDA; MKD; MLT; MNE; NLD; NOR; POL; PRT; ROU; RUS; SRB; SVK; SVN; SWE; TUR; UKR	ARM; AZE; GEO; TUR	DZA; MAR		DEU (8); ESP (1); GBR (3); NLD (3)
Valeriana macrocera (Torr. & A.Gray) Byng & Christenh.	V. macrocera (Torr. & A.Gray) A.Gray; V. macroptera (Suksd.) Piper				USA
Valeriana martini (Losco) Christenh. & Byng	V. martini Loscos; V. willkommii Freyn ex Willk.	ESP
Valeriana matheziana Christenh. & Byng	V. longiflora (Torr. & A.Gray) Walp.				USA
Valeriana muricata (Steven ex Roem. & Schult.) Sennikov	V. eriocarpa Krok ex Grossh.; V. ibizae Sennen & Elías; V. muricata (Steven ex Roem. & Schult.) W.H.Baxter; V. truncata (Rchb.) Betcke	CYP; GRC; RUS; TUR	ARM; AZE; CHN; GEO; IRN; IRQ; ISR; JOR; LBN; PAK; SAU; SYR; TJK; TKM; TUR; UZB			ISR (2); JOR (2)
Valeriana obtusiloba (Boiss.) Christenh. & Byng	V. obtusiloba Boiss.	GRC; TUR	ISR; JOR; LBN; SYR; TUR
Valeriana orientalis (DC.) Sennikov	V. conjungens Bunge ex Boiss.; V. dufresnia Bunge ex Boiss.; V. leiocarpa (K.Koch) Kuntze		AFG; ARM; AZE; GEO; IRN; IRQ; ISR; JOR; KAZ; KWT; LBN; PAK; SAU; SYR; TJK; TKM; TUR; UZB
Valeriana oxyrhyncha (Fisch. & C.A.Mey.) Christenh. & Byng	V. anodon Lincz.; V. diodon Boiss.; V. diplusodon Boiss.; V. oxyrhyncha Fisch. & C.A.Mey.; V. pteroloba Steud.; V. stocksii Boiss.		AFG; ARM; AZE; GEO; IRN; IRQ; ISR; JOR; KAZ; KGZ; LBN; PAK; SAU; SYR; TJK; TKM; TUR; UZB			ISR (2)
Valeriana ozarkana (Dyal) Christenh. & Byng	V. bushii Dyal; V. ozarkana Dyal				USA
Valeriana petrophila Bunge	V. petrophila (Bunge) Krok; V. pterophila (Bunge) Steud.		AFG; MNG; PAK; RUS
Valeriana plagiostephana (Fisch. & C.A.Mey.) Christenh. & Byng	V. plagiostephana Fisch. & C.A.Mey.		AFG; ARM; AZE; GEO; IRN; KAZ; KGZ; PAK; TJK; TKM; TUR; UZB			GEO (1)
Valeriana pleurota Christenh. & Byng	V. capitata Boiss. & Balansa; V. costata (Steven) Betcke; V. gibosa (Guss.) Tineo	BGR; BIH; GRC; HRV; ITA; MDA; MKD; MNE; ROU; RUS; SRB; SVN; UKR	TUR
Valeriana pontica (Lipsky) Christenh. & Byng	V. bulgarica Velen.; V. euxina Velen.; V. pontica Lipsky	BGR; RUS; UKR
Valeriana pumila (L.) Willd.	V. brachystephana (Ten.) Bertol.; V. cupulifera Le Grand; V. gracilis Fisch. & C.A.Mey.; V. heterocarpa Bisch.; V. laticuspis Bertol.; V. membranacea Loisel.; V. mutica A.Kern.; V. pulchella Fisch. ex Krok; V. pumila (L.) DC.; V. sheilii Boiss.; V. sphaerocarpa DC.; V. tridentata (Steven) Betcke; V. tridentata Gasp.	ALB; BGR; BIH; CYP; ESP; FRA; GRC; HRV; HUN; ITA; MDA; MKD; MLT; MNE; PRT; ROU; RUS; SRB; SVN; TUR; UKR	ARM; AZE; GEO; IRN; IRQ; ISR; JOR; LBN; SYR; TKM; TUR	DZA; MAR; TUN		ISR (2); unknown (4)
Valeriana regelii Sennikov	V. turkestanica Regel & Schmalh.		AFG; IRN; KAZ; KGZ; TKJ; TKM; UZB
Valeriana rimosa (Bastard) Christenh. & Byng	V. bessarabica Lipsky; V. laxiflora Dufr.; V. rimosa Bastard	ALB; AUT; BEL; BGR; BIH; BLR; CHE; CZE; DEU; DNK; ESP; FRA; GRC; HRV; HUN; ITA; LUX; MDA; MKD; MLT; MNE; NLD; POL; ROU; RUS; SRB; SVK; SVN; TUR; UKR	ARM; AZE; GEO; TUR	DZA; MAR		CHE (1); GBR (11); NLD (1); ROU (1); unknown (2)
Valeriana samolifolia (Bertero) Colla	V. samolifolia (Bertero) A.Gray				ARG; CHL
Valeriana sclerocarpa (Fisch. & C.A.Mey.) Christenh. & Byng	V. calcarata Steven ex Krok; V. remota Boiss. & Hohen.; V. sclerocarpa Fisch. & C.A.Mey.	RUS	AFG; ARM; AZE; GEO; IRN; ISR; JOR; SAU; TJK; TKM			ISR (8)
Valeriana szovitsiana (Fisch. & C.A.Mey.) Christenh. & Byng	V. aucheri Boiss.; V. persica Boiss.; V. szovitsiana Fisch. & C.A.Mey.; V. vvedenskyi Lincz.		AFG; ARM; AZE; CHN; GEO; IRN; IRQ; ISR; JOR; KAZ; KGZ; LBN; OMN; PAK; SAU; TJK; TKM; TUR; UZB	EGY		KGZ (1)
Valeriana triplaris (Boiss. & Buhse) Christenh. & Byng	V. triplaris Boiss. & Buhse.		AFG; IRN; PAK; TKM; UZB
Valeriana tuberculata (Boiss.) Christenh. & Byng	V. aksaensis M.N.Abdull.; V. tuberculata Boiss.		AFG; IRN; IRQ; ISR; JOR; LBN; PAK; SYR; TJK; TKM; TUR; UZB
Valeriana turgida (Steven) Christenh. & Byng	V. trigonocarpa DC.; V. turgida (Steven) Betcke	ALB; BGR; BIH; GRC; HRV; ITA; MDA; MKD; MNE; ROU; RUS; SRB; SVN; TUR; UKR	ARM; AZE; GEO; TUR
Valeriana umbilicata (Sull.) Christenh. & Byng	V. intermedia Dyal; V. patellaria (Sull. Ex A.Gray) Alph.Wood; V. umbilicata (Sull.) Alph.Wood				CAN; USA
Valeriana uncinata M.Bieb.	V. pubescens Krok; V. uncinata (M.Bieb) Dufr.	RUS; UKR	AFG; ARM; AZE; GEO; IRN; TJK; TKM; TUR; UZB			ARM (1); GEO (1)
Valeriana vesicaria (L.) Mill.	V. vesicaria (L.) Moench	CYP; ITA; GRC; MLT; TUR	IRN; IRQ; ISR; JOR; LBN; SYR; TKM; TUR	LBY		ISR (2); JOR (3)
Valeriana woodsiana (Torr. & A.Gray) Christenh. & Byng	V. radiata (L.) Dufr.; V. woodsiana (Torr. & A.Gray) Walp.				USA	USA (1)
Valerianella abyssinica Fresen.	V. abyssinica Fresen.; V. ambigua Lange ex Krok; V. bracteata Lowe; V. fallax Coss. & Durieu ex Coss.; V. microcarpa Loisel.; V. mixta (L.) Dufr.	BGR; ESP; FRA; GRC; ITA; PRT; TUR		DZA; ETH; KEN; LBY; MAR; TUN
Valerianella adylovii M.N.Abdull.	V. adylovii M.N.Abdull.		TKM
Valerianella amblyotis Fisch. & C.A.Mey. ex Hohen.	V. amblyotis Fisch. & C.A.Mey. ex Hohen.; V. lipskyi Lincz.	RUS	ARM; AZE; GEO; IRN; TKM
Valerianella antilibanotica Rech.f.	V. antilibanotica Rech.f.		LBN; SYR
Valerianella balansae V.A.Matthews	V. balansae V.A.Matthews; V. laxa Boiss. & Balansa		LBN; SYR; TUR
Valerianella chlorodonta Coss. & Durieu	V. chlorodonta Coss. & Durieu; V. microdonta Sennen & Mauricio			DZA; LBY; MAR; TUN
Valerianella chlorostephana Boiss. & Balansa	V. boissieri Krok; V. chlorostephana Boiss. & Balansa		IRN; IRQ; LBN; SYR; TUR
Valerianella corniculata C.A.Mey.	V. corniculata C.A.Mey.		ARM; AZE; GEO; IRN
Valerianella deserticola Hadač	V. deserticola Hadač		IRQ
Valerianella falconida Shvedtsch.	V. falconida Shvedtsch.	UKR
Valerianella glomerata Boiss. & Balansa	V. glomerata Boiss. & Balansa		TUR
Valerianella kulabensis Lipsky ex Lincz.	V. kulabensis Lipsky ex Lincz.		TJK
Valerianella leptocarpa Pomel	V. leptocarpa Pomel			DZA
Valerianella multidentata Loscos & J.Pardo	V. multidentata Loscos & J.Pardo	ESP		DZA; MAR
Valerianella orientalis (Schltdl.) Boiss. & Balansa	V. orientalis (Schltdl.) Boiss. & Balansa	CYP; GRC	ISR; JOR; LBN; SYR; TUR			ISR (3)
Valerianella ovczinnikovii Sharipova	V. ovczinnikovii Sharipova		TJK
Valerianella petrovichii Asch.	V. petrovichii Asch.			EGY; LBY
Valerianella platycarpa Trautv.	V. platycarpa Trautv.		ARM; AZE; GEO; IRN; TKM
Valerianella pomelii Batt.	V. chlorostephana Pomel; V. pomelii Batt.			DZA; MAR
Valerianella stephanodon Coss. & Durieu	V. stephanodon Coss. & Durieu			DZA; LBY; MAR; TUN
Valerianella triceras Bornm.	V. triceras Bornm.	CYP	TUR
Valerianella turcica Doğru-Koca & G.Zare	V. turcica Doğru-Koca & G.Zare		TUR
Valerianella varzobica Sharipova	V. varzobica Sharipova		TJK

## Sheet: Suppl. Table 3
Supplementary Table 3: Main passport data of the Valerianella samples collected in Poland.
Sample code	Collecting date	Species	District	Location	Latitude	Longitude	Elevation (m)	Habitat description	Population size	Sampling area	Sampled plants	Observed phenology	Remarks
PolVal24-001	2024-05-19	V. locusta (L.) Laterr.	Mazowieckie	Warsaw, close to the river Wisła	52.2763	21.0096	82	Slope of river dike	500-1000	50 x 2 m	60	Ripe seeds	Close to PolVal24-002
PolVal24-002	2024-05-19	V. locusta (L.) Laterr.	Mazowieckie	Warsaw, close to the river Wisła	52.276	21.009	83	Floodplain	50-100	5 x 5 m	31	Ripe seeds	Close to PolVal24-001
PolVal24-003	2024-05-20	V. locusta (L.) Laterr.	Kujawsko-Pomorskie	Between Włocławek and Płock, close to the river Wisła	52.6245	19.2537	59	Slope (exp. S) of river dike	>10000	100 x 5 m	50	Ripe seeds and empty fruits	Population continues beyond the sampling area
PolVal24-004	2024-05-20	V. locusta (L.) Laterr.	Kujawsko-Pomorskie	Toruń	53.0257	18.5689	48	Side of a dirt road in forest area	20-50	8 x 2 m	20	Ripe seeds and empty fruits
PolVal24-005	2024-05-20	V. locusta (L.) Laterr.	Kujawsko-Pomorskie	Stary Toruń, close to the river Wisła	53.0258	18.4517	43	Slope of river dike	200-500	100 x 10 m	45	Unripe and ripe seeds, empty fruits and occasional flowering
PolVal24-006	2024-05-20	V. locusta (L.) Laterr.	Kujawsko-Pomorskie	Przechowo, close to the river Wda	53.3989	18.4151	23	Slope (exp. S) of river dike	1000-5000	100 x 10 m	50	Ripe seeds and empty fruits	Population continues beyond the sampling area
PolVal24-007	2024-05-21	V. locusta (L.) Laterr.	Wielkopolskie	Patrzyków, close to the river Warta	52.215	18.3719	84	Slope (exp. NE) of river dike	200-500	300 x 2 m	67	Ripe seeds and empty fruits
PolVal24-008	2024-05-21	V. locusta (L.) Laterr.	Wielkopolskie	Sługocin, close to the river Warta	52.1914	18.0215	75	Riverside	20-50	10 x 2 m	16	Ripe seeds and empty fruits
PolVal24-009	2024-05-21	V. locusta (L.) Laterr.	Wielkopolskie	Ciążeń, close to the river Warta	52.2084	17.8185	75	Riverside	5-10	2 x 1 m	3	Unripe and ripe seeds
PolVal24-010	2024-05-21	V. locusta (L.) Laterr.	Wielkopolskie	Pietrzyków, in the neighbourhood of the river Warta	52.1928	17.7442	74	Meadow along a dirt road	5000-10000	50 x 50 m	90	Unripe and ripe seeds and occasional flowering	Huge population continuing beyond the sampling area
PolVal24-011	2024-05-21	V. locusta (L.) Laterr.	Wielkopolskie	Pyzdry, cose to the river Warta	52.1685	17.6986	67	Riverdike	500-1000	50 x 20 m	71	Unripe and ripe seeds and occasional flowering	Small plants
PolVal24-012	2024-05-21	V. locusta (L.) Laterr.	Wielkopolskie	Nowa Wieś Podgórna, close to the river Warta	52.1424	17.5897	73	Roadside along agricultural field	50-100	30 x 2 m	25	Unripe and ripe seeds, empty fruits and occasional flowering	Close to PolVal24-013
PolVal24-013	2024-05-21	V. locusta (L.) Laterr.	Wielkopolskie	Nowa Wieś Podgórna, close to the river Warta	52.1417	17.586	69	Riverside	1000-5000	50 x 5 m	60	Unripe and ripe seeds and empty fruits	Close to PolVal24-012
PolVal24-014	2024-05-21	V. locusta (L.) Laterr.	Wielkopolskie	Between Mosina and Rogalinek, close to the Mosiński Canal	52.2528	16.8843	54	Meadow along a sand road	50-100	20 x 10 m	36	Ripe seeds and empty fruits
PolVal24-015	2024-05-22	V. locusta (L.) Laterr.	Zachodniopomorskie	Widuchowa, close to the river Odra	53.1407	14.3918	6	Meadow with significant inclination	50-100	80 x 20 m	56	Unripe and ripe seeds, empty fruits and occasional flowering
PolVal24-016	2024-05-22	V. locusta (L.) Laterr.	Zachodniopomorskie	Krajnik Dolny, close to the river Odra	53.0493	14.3442	13	Roadside in forest area	50-100	20 x 2 m	47	Unripe and ripe seeds and occasional flowering
PolVal24-017	2024-05-22	V. locusta (L.) Laterr.	Zachodniopomorskie	Krzymów	52.9825	14.349	29	Weed field on slope along agricultural field	50-100	30 x 5 m	30	Unripe and ripe seeds and occasional flowering	Close to PolVal24-059
PolVal24-018	2024-05-22	V. locusta (L.) Laterr.	Lubuskie	Słońsk	52.5628	14.8148	34	Side of a dirt road along agricultural field	50-100	50 x 30 m	30	Unripe and ripe seeds and empty fruits
PolVal24-019	2024-05-22	V. locusta (L.) Laterr.	Lubuskie	Górzyca	52.4986	14.6594		Slope along railroad track in forest area	10-15	3 x 2 m	8	Unripe and ripe seeds and empty fruits
PolVal24-020	2024-05-22	V. locusta (L.) Laterr.	Lubuskie	Laski Lubuskie	52.475	14.6885	48	Roadside along agricultural field	20-50	2 x 1 m	20	Unripe and ripe seeds
PolVal24-021	2024-05-22	V. locusta (L.) Laterr.	Lubuskie	Rozłogi	52.248	15.4964	87	Roadside along a house	20-30	10 x 2 m	14	Ripe seeds and (mostly) empty fruits	Empty fruits due to heavy rainfall
PolVal24-022	2024-05-23	V. locusta (L.) Laterr.	Lubuskie	Drzonków	51.8875	15.5727	92	Side of a dirt road, close to newly build houses and agricultural field	200-500	30 m2 + 20 m2	65	Unripe and ripe seeds and occasional flowering	Samples from two patches with interspacing
PolVal24-023	2024-05-23	V. locusta (L.) Laterr.	Lubuskie	Bobrowice, close to the river Bóbr	51.9464	15.1089	60	Slope (exp. SE) of river dike	20-50	50 x 2 m	20	Unripe and ripe seeds and empty fruits
PolVal24-024	2024-05-23	V. locusta (L.) Laterr.	Lubuskie	Grabik	51.6554	15.1164	166	Both sides of a railroad track	1000-5000	100 x 4 m	85	Unripe and ripe seeds and empty fruits
PolVal24-025	2024-05-23	V. locusta (L.) Laterr.	Lubuskie	Żary	51.6277	15.1037	167	Slope (exp. E) along ditch in agricultural fields	5000-10000	25 x 2 m	85	Unripe and ripe seeds and many flowering plants
PolVal24-026	2024-05-24	V. locusta (L.) Laterr.	Dolnośląskie	Sulistrowice	50.839	16.7743	268	Roadside along agricultural field, next to forest area	1000-2000	30 x 2 m	85	Unripe and ripe seeds and occasional flowering
PolVal24-027	2024-05-24	V. locusta (L.) Laterr.	Dolnośląskie	Kunów	50.8934	16.7839	182	Side of a dirt road in forest area	50-100	30 x 10 m	30	Unripe and ripe seeds and empty fruits
PolVal24-028	2024-05-24	V. locusta (L.) Laterr.	Dolnośląskie	Mietków, next to lake Zalew Mietkowski	50.9705	16.6364	174	Slope of dike along lake	100-200	10 x 5 m	36	Unripe and ripe seeds and occasional flowering
PolVal24-029	2024-05-24	V. locusta (L.) Laterr.	Dolnośląskie	Sobótka	50.9	16.7323	208	Slope of a ditch along a road	50-100	25 x 2 m	35	Brown plants and seeds, mostly empty fruits
PolVal24-030	2024-05-24	V. locusta (L.) Laterr.	Dolnośląskie	Wrocław	51.0773	16.9829	121	Roadside close to new bridge	200-500	10 x 4 m	50	Unripe and ripe seeds	Plants possibly introduced through building activities
PolVal24-031	2024-05-24	V. locusta (L.) Laterr.	Dolnośląskie	Wrocław, close to the river Ślęża	51.1232	16.9396	113	Riverside	500-1000	100 x 4 m	50	Unripe and ripe seeds and occasional flowering
PolVal24-032	2024-05-25	V. locusta (L.) Laterr.	Dolnośląskie	Oława, close to the river Odra	50.9456	17.3356	134	Slope of river dike, next to forest area	20-30	100 x 3 m	8	Brown plants and seeds, mostly empty fruits	Large inter-plant distances
PolVal24-033	2024-05-25	V. locusta (L.) Laterr.	Opolskie	Łambinowice	50.5376	17.5643	205	Railroad track	500-1000	200 x 20 m	55	Brown plants, unripe and ripe seeds and occasional flowering
PolVal24-034	2024-05-25	V. locusta (L.) Laterr.	Opolskie	Kluczbork	50.9928	18.1955	215	Between (partly within) agricultural field and area with shrubs and trees	1000-5000	50 x 2 m	54	Ripe seeds and empty fruits
PolVal24-035	2024-05-26	V. locusta (L.) Laterr.	Mazowieckie	Jabłonna, close to the river Wisła	52.3618	20.9224	76	Side of a dirt road, next to shrubs and trees	10-20	15 x 3 m	13	Unripe and ripe seeds and empty fruits
PolVal24-036	2024-05-26	V. locusta (L.) Laterr.	Mazowieckie	Jabłonna, close to the river Wisła	52.3593	20.9198	76	Slopes of river dike	50-100	200 x 10 m	34	Unripe and ripe seeds and empty fruits
PolVal24-037	2024-05-26	V. locusta (L.) Laterr.	Świętokrzyskie	Pińczów	50.5195	20.532	204	Side walk along wall of cemetery	10-20	5 x 1 m	12	Flowering plants, except for a single brown plant with seeds	11 plants sampled later
PolVal24-038	2024-05-26	V. locusta (L.) Laterr.	Świętokrzyskie	Pińczów	50.5175	20.553	243	Along a path on hill in forest area	20-50	50 x 4 m	32	Unripe and ripe seeds and occasional flowering
PolVal24-039	2024-05-27	V. locusta (L.) Laterr.	Świętokrzyskie	Czworaki	50.5781	20.5192	198	Small slopes along old railroad track	200-500	100 x 3 m	42	Unripe and ripe seeds and empty fruits
PolVal24-040	2024-07-08	V. dentata (L.) Pollich	Świętokrzyskie	Pińczów	50.5376	20.5098	229	Cereal field on slope (exp. S) of limestone hill	1000-5000	50 x 10 m	30	Ripe seeds
PolVal24-041	2024-05-27	V. locusta (L.) Laterr.	Świętokrzyskie	Pińczów	50.5099	20.5598	217	Ruderal area on limestone hill, close to agricultural fields	20-50	10 x 3 m	20	Mostly brown plants with few seeds	Most seeds originating from 30 additional plants located higher up the hill (50.507802, 20.564765)
PolVal24-042	2024-05-27	V. locusta (L.) Laterr.	Świętokrzyskie	Wełecz	50.4666	20.6861	246	Margin of an agricultural field	1	0.5 x 0.5 m	1	Unripe and ripe seeds
PolVal24-043	2024-07-09	V. dentata (L.) Pollich	Małopolskie	Miechów, Kalina-Lisiniec	50.3623	20.1594	332	Margin of an agricultural field	20-50	20 x 2 m	10	Ripe seeds
PolVal24-044	2024-05-28	V. locusta (L.) Laterr.	Podkarpackie	Nowiny, close to the river San	50.69	21.9056	140	Foot of river dike (exp. S)	200-500	10 x 10 m	43	Unripe and ripe seeds and empty fruits	High vegetation
PolVal24-045	2024-05-28	V. locusta (L.) Laterr.	Podkarpackie	Przychojec	50.3247	22.3968	158	Roadside along ditch and agricultural field	20-50	2 x 2 m	23	Brown plants, unripe and ripe seeds and empty fruits
PolVal24-046	2024-05-28	V. locusta (L.) Laterr.	Podkarpackie	Wierzawice	50.2166	22.4727	174	Slope of a small dike along railroad track in agricultural area	20-50	20 x 2 m	12	Brown plants, ripe seeds and empty fruits
PolVal24-047	2024-05-28	V. locusta (L.) Laterr.	Podkarpackie	Tryńcza, close to the river Wisłok	50.162	22.548	178	Slope of small dike between road and meadow	200-500	100 x 3 m	46	Brown plants, unripe and ripe seeds
PolVal24-048	2024-05-29	V. locusta (L.) Laterr.	Lubelskie	Annopol, close to the river Wisła	50.9109	21.8371	141	Roadside under trees	100-200	50 x 2 m	25	Brown plants, unripe and ripe seeds
PolVal24-049	2024-05-29	V. locusta (L.) Laterr.	Lubelskie	Wałowice-Kolonia, close to the river Wisła	50.9778	21.8293	136	Slope of small dike along a road, close to a small building and pond	200-500	20 x 3 m	75	Brown plants, unripe and ripe seeds and flowering plants	Large variation in phenology and morphology (plant height, leaf size)
PolVal24-050	2024-05-29	V. locusta (L.) Laterr.	Lubelskie	Józefów nad Wisłą, close to the river Wisła	51.0332	21.823	133	Slope (exp. N) of river dike	500-1000	50 x 2 m	53	Unripe and many ripe seeds	Population continues beyond the sampling area, plants mostly at the top of the dike and only at north side
PolVal24-051	2024-05-29	V. locusta (L.) Laterr.	Lubelskie	Zakrzów, close to the river Wisła	51.1933	21.7929	126	Foot of apple trees in orchard	9	2 x 1 m	9	Unripe and ripe seeds
PolVal24-052	2024-05-29	V. locusta (L.) Laterr.	Lubelskie	Zastów Karczmiski, close to the river Wisła	51.2747	21.8626	120	Foot of apple trees in orchard	5000-10000	30 x 20 m	80	Unripe and ripe seeds	Population continues beyond the sampling area
PolVal24-053	2024-05-29	V. locusta (L.) Laterr.	Lubelskie	Wólka Gołębska, close to the river Wisła	51.4725	21.9124	129	Slope (exp. SE) of river dike	>10000	100 x 5 m	70	Brown plants and seeds, occasional green/yellow plant	Population continues beyond the sampling area
PolVal24-054	2024-05-29	V. locusta (L.) Laterr.	Mazowieckie	Mozolice Małe, close to the river Wisła	51.5705	21.6722	113	Slope (exp. SE) of river dike	2000-5000	50 x 3 m	50	Brown plants and seeds	Population continues beyond the sampling area
PolVal24-055	2024-05-29	V. locusta (L.) Laterr.	Mazowieckie	Piotrkowice, close to the river Wisła	51.6423	21.553	109	Slope (exp. SE) of river dike	20-50	5 x 2 m	16	Unripe and ripe seeds
PolVal24-056	2024-07-08	V. dentata (L.) Pollich	Świętokrzyskie	Pasturka (Pińczów)	50.4954	20.5809	200	Margin of an agricultural field	20-50	20 x 3 m	15	Unripe and ripe seeds
PolVal24-057	2024-07-08	V. dentata (L.) Pollich	Świętokrzyskie	Wola Zagojska Górna (Pińczów)	50.4467	20.6072	226	Margin of an agricultural field	20-50	20 x 2 m	25	Unripe and ripe seeds
PolVal24-058	2024-05-25	V. carinata Loisel.	Opolskie	Łambinowice	50.5378	17.5652	205	Railroad track	5-10	10 x 2 m	5	Unripe and ripe seeds and empty fruits
PolVal24-059	2024-05-22	V. locusta (L.) Laterr.	Zachodniopomorskie	Krzymów	52.9825	14.348	29	Margin of an agricultural field	20-50	50 x 3 m	15	Unripe and ripe seeds	Close to PolVal24-017

## Sheet: Suppl. Table 4
Supplementary Table 4: Collecting site characteristics and thousand-seed weight (TSW) of the Valerianella samples collected in Poland. Group numbers correspond to the results of the cluster analysis presented in Fig. 4.
Sample code	Habitat type	Accompanying species	Group number	TSW
PolVal24-001	1	Agropyron repens; Brasica napus; Capsella bursa-pastoris; Dactylis glomerata; Matricaria chamomilla; Medicago sativa; Plantago lanceolata	G7	0.6
PolVal24-002	2	Bromus arvensis; Centaurea stoebe; Festuca pratensis; Galium mollugo; Medicago lupulina; Myosotis arvensis; Rumex obtusifolius; Tragopogon pratensis; Vicia cracca	G4	0.643333
PolVal24-003	1	Equisetum arvense; Festuca rubra; Holcus lanatus; Potentilla argentea; Rumex acetosella; Veronica arvensis; Vicia cracca	G5	0.546667
PolVal24-004	3	Aegopodium podagraria; Agrostis stolonifera; Artemisia vulgaris; Cirsium arvense; Dactylis glomerata; Medicago falcata; Plantago lanceolata; Rubus caesius	G7	0.71
PolVal24-005	1	Achillea millefolium; Alopecurus pratensis; Anthricus sylvestris; Arrhenatherum elatius; Capsella bursa-pastoris; Cerastium arvense; Chaerophyllum bulbosum; Equisetum arvense; Festuca rubra; Galium mollugo; Poa pratensis; Rubus caesius; Vicia hirsuta; Vicia sepium	G8	0.56
PolVal24-006	1	Achillea millefolium; Anchusa officinalis; Arrhenatherum elatius; Capsella bursa-pastoris; Carduus acanthoides; Galium mollugo; Medicago sativa; Papaver rhoeas; Plantago lanceolata; Poa annua; Taraxacum officinale; Veronica arvensis; Vicia hirsuta	G6	0.486667
PolVal24-007	1	Achillea millefolium; Anchusa officinalis; Arrhenatherum elatius; Bromus sterilis; Capsella bursa-pastoris; Centaurea cyanus; Cirsium arvense; Dianthus cartusinoides; Erodium cicutarium; Lithospermum arvense; Medicago sativa; Papaver rhoeas; Potentilla argentea; Taraxacum officinale; Vicia grandiflora	G6	0.563333
PolVal24-008	2	Achillea millefolium; Arrhenatherum elatius; Festuca pratensis; Glechoma hederacea; Holcus lanatus; Lactuca serriola; Phragmites communis; Polygonum aviculare; Rubus caesius; Rumex crispus; Tanacetum vulgare	G10	0.61
PolVal24-009	2	Arrhenatherum elatius; Centaurea jacea; Festuca rubra; Galium pratensis; Phleum pratense; Rumex obtusifolius; Tragopogon pratensis; Vicia cracca	G4
PolVal24-010	3	Capsella bursa-pastoris; Dactylis glomerata; Erigeron canadensis; Erodium cicutarium; Myosotis arvensis; Phleum pratense; Tanacetum vulgare; Veronica arvensis; Vicia grandiflora; Vicia hirsuta	G7	0.73
PolVal24-011	1	Bromus secalinus; Bromus sterilis; Centaurea cyanus; Centaurea stoebe; Dactylis glomerata; Dianthus cartusinoides; Erigeron canadensis; Erodium cicutarium; Lolium perenne; Plantago lanceolata; Poa annua; Potentilla argentea; Scleranthus annuus; Trifolium repens; Veronica arvensis	G7	0.55
PolVal24-012	5	Achillea millefolium; Artemisia vulgaris; Berteroa incana; Bromus secalinus; Capsella bursa-pastoris; Cerastium arvense; Equisetum arvense; Erodium cicutarium; Lithospermum arvense; Papaver rhoeas; Poa annua; Rubus sp.; Sisymbrium sp.; Viola arvensis	G6	1.01
PolVal24-013	2	Agrostis stolonifera; Armeria maritima; Capsella bursa-pastoris; Festuca rubra; Lactuca serriola; Linaria vulgaris; Phleum pratense; Rumex acetosella; Rumex crispus; Thymus serpyllum	G5	0.51
PolVal24-014	3	Agrostis stolonifera; Bromus secalinus; Capsella bursa-pastoris; Dactylis glomerata; Lotus corniculatus; Plantago lanceolata; Radiola linoides; Rumex crispus; Veronica arvensis	G7	0.647
PolVal24-015	3	Arrhenatherum elatius; Anthemis arvensis; Cerastium arvense; Dactylis glomerata; Daucus carota; Equisetum arvense; Galium mollugo; Holcus lanatus; Hypericum perforatum; Lotus corniculatus; Pimpinella saxifraga; Taraxacum officinalle; Veronica chamaedrys; Vicia hirsuta; Vicia villosa	G8	0.633333
PolVal24-016	3	Arabidopsis thaliana; Cerastium caespitosum; Myosotis arvensis; Poa trivalis; Polygonum aviculare; Rumex obtusifolius; Spergularia rubra; Tanacetum vulgare; Veronica arvensis; Vicia hirsuta	G7	0.393333
PolVal24-017	3	Achillea millefolium; Anchusa officinalis; Artemisia vulgaris; Brassica napus; Chenopodium album; Dactylis glomerata; Euphorbia helioscopia; Hypericum perforatum; Myosotis arvensis; Rubus sp.; Silene latifolia; Vicia tenuifolia	G6	0.676667
PolVal24-018	5	Apera spica-venti; Arctium tomentosum; Arenaria serpyllifolia; Artemisia vulgaris; Bromus sterilis; Capsella bursa-pastoris; Centaurea cyanus; Chenopodium album; Geranium pratense; Lamium amplexicaule; Papaver argemone; Papaver rhoeas; Polygonum aviculare; Senecio vulgaris; Silene latifolia; Veronica arvensis; Viola arvensis	G3	0.803
PolVal24-019	4	Chenopodium album; Dactylis glomerata; Festuca rubra; Stellaria media; Taraxacum officinale; Urtica dioica	G3
PolVal24-020	5	Artemisia vulgaris; Brassica napus; Capsella bursa-pastoris; Centaurea cyanus; Cerastium caespitosum; Chenopodium album; Convolvulus arvensis; Festuca rubra; Lolium perenne; Papaver rhoeas; Rubus caesius; Senecio vulgaris; Stellaria media; Urtica dioica; Vicia villosa	G6	0.833333
PolVal24-021	3	Achillea millefolium; Arrhenatherum elatius; Anthemis arvensis; Centaurea stoebe; Cerastium caespitosum; Galium verum; Plantago major; Potentilla anserina; Potentilla argentea; Rumex crispus; Urtica dioica; Viola tricolor	G10
PolVal24-022	3	Achillea millefolium; Arrhenatherum elatius; Artemisia vulgaris; Centaurea stoebe; Cerastium caespitosum; Daucus carota; Euphorbia cyparissias; Galium verum; Geranium pusillum; Hypericum perforatum; Lactuca serriola; Papaver rhoeas; Plantago lanceolata; Potentilla argentea; Rumex acetosella; Rumex crispus; Tanacetum vulgare; Urtica dioica; Viola tricolor	G10	0.653333
PolVal24-023	1	Arrhenatherum elatius; Artemisia vulgaris; Capsella bursa-pastoris; Cerastium arvense; Dactylis glomerata; Euphorbia cyparissias; Galium mollugo; Knautia arvensis; Medicago lupulina; Papaver rhoeas; Rubus sp.; Rubus caesius; Rumex acetosella; Rumex obtusifolius; Silene latifolia; Tanacetum vulgare; Urtica dioica; Veronica chamaedrys; Vicia hirsuta	G8	0.597
PolVal24-024	4	Arrhenatherum elatius; Artemisia vulgaris; Chenopodium album; Coronilla varia; Dactylis glomerata; Festuca rubra; Hypericum perforatum; Rumex acetosella; Rumex obtusifolius; Stellaria media; Taraxacum officinale; Urtica dioica; Veronica chamaedrys	G3	0.876667
PolVal24-025	5	Aethusa cynapium; Capsella bursa-pastoris; Convolvulus arvensis; Equisetum arvense; Euphorbia helioscopia; Holcus lanatus; Medicago lupulina; Papaver rhoeas; Plantago lanceolata; Poa annua; Rumex crispus; Trifolium arvense; Veronica chamaedrys	G5	1.14667
PolVal24-026	5	Bromus sterilis; Capsella bursa-pastoris; Convolvulus arvensis; Euphorbia helioscopia; Galium aparine; Galium mollugo; Geranium pusillum; Lactuca serriola; Matricaria chamomilla; Veronica polita	G5	0.956667
PolVal24-027	3	Anthricus caucalis; Fallopia dumentorum; Myosotis sparsiflora; Poa nemoralis; Prunus spinosa; Robinia pseudoacacia; Viola reichenbachiana	G5	0.563333
PolVal24-028	1	Arrhenatherum elatius; Galium mollugo; Holcus lanatus; Rumex acetosa; Veronica chamaedrys	G8	0.736667
PolVal24-029	3	Arrhenatherum elatius; Convolvulus arvensis; Coronilla varia; Erigeron annuus; Scabiosa ochroleuca	G9
PolVal24-030	3	Acer negundo; Arrhenatherum elatius; Artemisia vulgaris; Bromus mollis; Bromus sterilis; Calamagrostis epigejos; Cirsium arvense; Equisetum arvense; Galium aparine; Geum urbanum; Hypericum perforatum; Lathyrus pratensis; Poa pratensis; Rumex crispus; Solidago canadensis; Solidago gigantea; Tanacetum vulgare; Vulpia myuros	G10	0.49
PolVal24-031	2	Agropyron repens; Alopecurus pratensis; Arrhenatherum elatius; Bromus inermis; Bromus sterilis; Capsella bursa-pastoris; Chaerophyllum bulbosum; Convolvulus arvensis; Dactylis glomerata; Equisetum arvense; Festuca pratensis; Galium aparine; Galium mollugo; Rubus caesius; Rumex crispus; Sisymbrium loeselii; Urtica dioica; Vicia sepium	G8	0.666667
PolVal24-032	1	Arrhenatherum elatius; Bromus sterilis; Dactylis glomerata; Equisetum arvense; Galium mollugo; Holcus lanatus; Hypericum perforatum; Lathyrus pratensis; Plantago lanceolata; Rubus caesius; Saponaria officinalis; Trifolium repens	G8
PolVal24-033	4	Arenaria serpyllifolia; Bromus sterilis; Chenopodium album; Geranium pusillum; Lactuca serriola; Matricaria discoidea; Papaver rhoeas; Saponaria officinalis; Taraxacum officinale; Trifolium repens; Vicia hirsuta	G3
PolVal24-034	5	Achillea millefolium; Arenaria serpyllifolia; Artemisia vulgaris; Bromus sterilis; Centaurea cyanus; Papaver rhoeas; Potentilla anserina; Potentilla erecta; Solidago canadensis; Stellaria media; Tanacetum vulgare; Vicia hirsuta	G10	0.913
PolVal24-035	3	Crataegus sp.; Dactylis glomerata; Festuca rubra; Plantago major; Poa annua; Solidago gigantea; Urtica dioica	G7	0.76
PolVal24-036	1	Achillea millefolium; Arrhenatherum elatius; Dactylis glomerata; Equisetum arvense; Galium mollugo; Knautia arvensis; Medicago sativa; Myosotis arvensis; Potentilla argentea; Rumex obtusifolius	G8	0.48
PolVal24-037	3	Capsella bursa-pastoris; Plantago major; Poa annua; Stellaria media; Taraxacum officinale	G2	0.646667
PolVal24-038	3	Agrostis sp.; Arctium tomentosum; Berteroa incana; Bromus sterilis; Capsella bursa-pastoris; Cerastium arvense; Dactylis glomerata; Erigeron canadensis; Lactuca serriola; Medicago falcata; Medicago sativa; Pastinaca sativa; Phleum pratense; Plantago lanceolata; Potentilla anserina; Potentilla reptans; Rubus scissus; Rumex crispus; Solidago canadensis; Trifolium repens; Taraxacum officinale; Urtic…	G7	0.77
PolVal24-039	4	Angelica sylvestris; Anthricus sylvestris; Arrhenatherum elatius; Cerastium caespitosum; Chaerophyllum aromaticum; Chaerophyllum bulbosum; Crepis biennis; Dactylis glomerata; Equisetum arvense; Erigeron annuus; Galium mollugo; Geranium cinereum; Geranium purpureum; Geranium pusillum; Hypericum perforatum; Lapsana communis; Myosotis arvensis; Pastinaca sativa; Plantago major; Ranunculus acris; Urt…	G8	0.74
PolVal24-040	5	Aethusa cynapium; Agropyron repens; Arenaria serpyllifolia; Artemisia vulgaris; Berteroa incana; Capsella bursa-pastoris; Centaurea cyanus; Chenopodium album; Cirsium arvense; Convolvulus arvensis; Coronilla varia; Erigeron annuus; Erysimum cheiranthoides; Euphorbia cyparissias; Euphorbia helioscopia; Lamium amplexicaule; Lithospermum arvense; Lotus corniculatus; Matricaria chamomilla; Medicago f…	G1	0.856667
PolVal24-041	5	Achillea millefolium; Agrimonia eupatoria; Anchusa officinalis; Anemone sylvestris; Anthemis tinctoria; Arrhenatherum elatius; Artemisia campestris; Asparagus officinalis; Bromus sterilis; Campanula rapunculoides; Carduus acanthoides; Cerinthe minor; Convolvulus arvensis; Coronilla varia; Daucus carota; Descurainia sophia; Erigeron annuus; Euphorbia cyparissias; Falcaria vulgaris; Leucanthemum vu…	G9	0.94
PolVal24-042	5	Avena fatua; Bromus arvensis; Bupleurum rotundifolium; Centaurea cyanus; Convolvulus arvensis; Euphorbia exigua; Euphorbia helioscopia; Lithospermum arvense; Melampyrum arvense; Myosotis arvensis; Neslia paniculata; Odontites rubra; Papaver rhoeas; Poa annua; Stachys annua	G1	0.863
PolVal24-043	5	Aethusa cynapium; Agrostemma githago; Avena fatua; Caucalis daucoides; Centaurea cyanus; Euphorbia exigua; Lithospermum arvense; Myosotis arvensis; Neslia paniculata; Papaver rhoeas; Ranunculus arvensis; Stachys annua; Vicia angustifolia	G1	0.977
PolVal24-044	1	Achillea millefolium; Arrhenatherum elatius; Artemisia vulgaris; Cerastium caespitosum; Convolvulus arvensis; Coronilla varia; Dactylis glomerata; Erigeron annuus; Leucanthemum vulgare; Medicago lupulina; Medicago sativa; Plantago lanceolata; Potentilla argentea; Symphytum officinale; Taraxacum officinale; Trifolium arvense; Trifolium repens; Veronica arvensis; Veronica chamaedrys; Vicia hirsuta	G9	0.53
PolVal24-045	5	Arctium tomentosum; Arrhenatherum elatius; Artemisia vulgaris; Bromus arvensis; Dactylis glomerata; Erigeron annuus; Geranium pusillum; Lactuca serriola; Plantago lanceolata; Plantago major; Sonchus oleraceus; Taraxacum officinale; Trifolium arvense; Urtica dioica	G9	0.83
PolVal24-046	4	Achillea millefolium; Agropyron repens; Arrhenatherum elatius; Artemisia vulgaris; Berteroa incana; Bromus arvensis; Cerastium caespitosum; Chenopodium album; Dactylis glomerata; Equisetum arvense; Erigeron annuus; Geranium pusillum; Leucanthemum vulgare; Myosotis arvensis; Papaver rhoeas; Phleum pratense; Plantago lanceolata; Potentilla argentea; Urtica dioica	G9
PolVal24-047	3	Arrhenatherum elatius; Bromus arvensis; Convolvulus arvensis; Dactylis glomerata; Erigeron annuus; Galium aparine; Galium mollugo; Polygonum aviculare; Sonchus oleraceus; Urtica dioica; Veronica arvensis; Veronica persica	G9	0.8
PolVal24-048	3	Alyssum alyssoides; Arrhenatherum elatius; Crataegus sp.; Dactylis glomerata; Euphorbia cyparissias; Galium mollugo; Medicago lupulina; Medicago sativa; Plantago lanceolata; Rumex obtusifolius; Sedum acre; Tanacetum vulgare; Trifolium repens; Veronica chamaedrys	G8	0.566667
PolVal24-049	3	Arenaria serpyllifolia; Bromus arvensis; Capsella bursa-pastoris; Chenopodium album; Daucus carota; Descurainia sophia; Equisetum arvense; Erigeron annuus; Fumaria officinalis; Galium aparine; Geranium pusillum; Lactuca serriola; Leucanthemum vulgare; Medicago lupulina; Papaver argemone; Papaver rhoeas; Poa annua; Poa nemoralis; Ranunculus acris; Raphanus sp.; Rubus sp.; Senecio vulgaris; Sonchus…	G2	0.676667
PolVal24-050	1	Arctium tomentosum; Arrhenatherum elatius; Bromus arvensis; Capsella bursa-pastoris; Cirsium arvense; Convolvulus arvensis; Dactylis glomerata; Dipsacus laciniatus; Equisetum arvense; Erysimum cheiranthoides; Galium aparine; Galium mollugo; Juncus sp.; Lotus corniculatus; Medicago lupulina; Medicago sativa; Melilotus officinalis; Myosotis arvensis; Plantago lanceolata; Potentilla argentea; Potent…	G8	0.573
PolVal24-051	6	Bromus arvensis; Capsella bursa-pastoris; Crataegus sp.; Equisetum arvense; Plantago major; Poa annua; Ranunculus acris; Sonchus oleraceus; Symphytum officinale; Taraxacum officinale; Trifolium arvense; Veronica persica; Vicia hirsuta	G2	1.00333
PolVal24-052	6	Bromus arvensis; Capsella bursa-pastoris; Chenopodium album; Equisetum arvense; Erigeron annuus; Lamium purpureum; Medicago lupulina; Plantago major; Potentilla anserina; Ranunculus acris; Tanacetum vulgare; Taraxacum officinale; Veronica persica	G2	0.93
PolVal24-053	1	Agropyron repens; Anthricus sylvestris; Arrhenatherum elatius; Bromus arvensis; Capsella bursa-pastoris; Convolvulus arvensis; Erigeron annuus; Euphorbia cyparissias; Medicago falcata; Papaver rhoeas; Plantago lanceolata; Polygonum aviculare; Potentilla argentea; Rubus sp.; Silene inflata	G9	0.66
PolVal24-054	1	Arrhenatherum elatius; Artemisia sp.; Dactylis glomerata; Euphorbia cyparissias; Galium mollugo; Medicago sp.; Plantago lanceolata; Potentilla argentea; Rubus sp.; Rumex acetosella; Rumex obtusifolius	G8	0.346667
PolVal24-055	1	Arrhenatherum elatius; Dactylis glomerata; Festuca rubra; Galium mollugo; Knautia arvensis; Plantago lanceolata; Potentilla argentea; Rumex crispus; Tanacetum vulgare	G10
PolVal24-056	5	Achillea millefolium; Aethusa cynapium; Arenaria serpyllifolia; Artemisia vulgaris; Berteroa incana; Centaurea cyanus; Cirsium arvense; Convolvulus arvensis; Coronilla varia; Euphorbia cyparissias; Euphorbia esula; Euphorbia helioscopia; Falcaria vulgaris; Galium aparine; Lactuca serriola; Lamium amplexicaule; Lithospermum arvense; Lotus corniculatus; Matricaria chamomilla; Medicago falcata; Medi…	G1	0.97
PolVal24-057	5	Arenaria serpyllifolia; Centaurea cyanus; Consolida regalis; Convolvulus arvensis; Galium aparine; Lithospermum arvense; Medicago lupulina; Melandrium noctoflorum; Myosotis arvensis; Neslia paniculata; Papaver rhoeas; Polygonum aviculare; Scandix pecten-veneris; Stellaria media; Taraxacum officinale; Trifolium repens; Veronica persica; Vicia hirsuta	G1	1.00333
PolVal24-058	4	Arenaria serpyllifolia; Bromus sterilis; Chenopodium album; Geranium pusillum; Lactuca serriola; Matricaria discoidea; Papaver rhoeas; Saponaria officinalis; Stellaria media; Taraxacum officinale; Trifolium pratense; Trifolium repens; Urtica dioica; Vicia hirsuta; Viola arvensis	G3
PolVal24-059	5	Apera spica-venti; Arenaria serpyllifolia; Bromus sterilis; Capsella bursa-pastoris; Centaurea cyanus; Chenopodium album; Geranium pusillum; Matricaria chamomilla; Matricaria discoidea; Myosotis arvensis; Papaver rhoeas; Veronica arvensis; Viola arvensis	G3	0.903333

## Sheet: Suppl. Table 5
Supplementary Table 5: Accepted species names of the genus Valeriana as documented in Plants of the World Online (additional to Suppl. Table 2). Native distribution and number of entries in Genesys are denoted by three-letter ISO country code.
	Native distribution
Additional Valeriana species	Europe	Asia	Africa	Americas	Representation Genesys
V. acutiloba Rydb.				USA
V. adscendens Turcz.				ECU; PER
V. aequiloba Clos				CHL	CHL (1)
V. agrimoniifolia Killip				PER
V. ajanensis Kom.		RUS
V. alanyensis Yüceol, Çeçen & Göktürk		TUR
V. albiflora (Sharipova) Sharipova		TJK
V. albonervata B.L.Rob. ex Seaton				MEX
V. alliariifolia Vahl	GRC; RUS	ARM; AZE; GEO; IRN; IRQ; TUR			AZE (1); GEO (4)
V. alpestris Steven	RUS	ARM; AZE; GEO; TUR			GEO (1)
V. altaica Sumnev.		MNG; RUS
V. alternifolia Ledeb.		CHN; MNG; RUS			RUS (1)
V. alypifolia Kunth				ECU
V. amazonum (Fridl. & A.Raynal) Christenh. & Byng	ITA				ITA (1)
V. amurensis P.A.Smirn. ex Kom.		CHN; KOR; PRK; RUS
V. angustifolia Mill.	CHE; FRA; ITA				ITA (2)
V. apiifolia A.Gray ex S.Watson				MEX
V. apula Pourr.	ESP; FRA		MAR
V. arborea Killip & Cuatrec.				COL
V. aretiastra Christenh. & Byng				PER
V. aretioides Kunth				BOL; ECU
V. arizonica A.Gray				USA
V. armena P.A.Smirn.		ARM; AZE; GEO
V. asarifolia Dufr.	GRC
V. aschersoniana Graebn. ex Weberb.				BOL; PER
V. asplenifolia Killip				PER
V. assamensis Gand.		BTN; CHN; IND; MMR; NPL
V. asterothrix Killip				ECU
V. atacamensis Borsini				CHL
V. baltana Graebn.				PER
V. bambusicaulis Killip				PER
V. barbareifolia M.Martens & Galeotti				MEX
V. barbulata Diels		BTN; CHN; IND; MMR; NPL
V. battandieri (Maire) Christenh. & Byng			DZA; MAR
V. beddomei C.B.Clarke		IND
V. belonantha Christenh. & Byng				BOL; PER
V. bertiscea Pančić	ALB; BIH; GRC; HRV; MNE; MKD; SRB; SVN
V. boelckei Rossow				ARG; CHL
V. boliviana Britton				BOL
V. bolkarica Contandr. & Quézel		TUR
V. bornmuelleri Pilg.				BRA
V. borsinii Rossow				ARG
V. bracteata Benth.				COL; ECU
V. bracteosa Phil.				CHL
V. bractescens (Hook.) Höck				COL; VEN
V. bridgesii Hook. & Arn.				CHL	CHL (2)
V. briquetiana H.Lév.		CHN
V. bryophila Barrie				MEX
V. buxifolia F.G.Mey.				ECU
V. calcitrapae L.	BIH; ESP; FRA; GRC; HRV; ITA; MKD; MLT; MNE; PRT; SRB; SVN; UKR	ISR; JOR; LBN; SYR; TUR	DZA; EGY; LBY; MAR; TUN
V. californica A.Heller				USA	USA (2)
V. calvescens Briq.				ARG; BOL
V. calycina (Maire) Christenh. & Byng			DZA
V. candolleana Gardner				ARG; BOL; BRA; COL; CRI; CUB; DOM; ECU; GTM; GUY; HND; MEX; NIC; PAN; PER; PRY; SLV; VEN
V. caparaoensis Rabuske, Sobral & Iganci				BRA
V. capensis Thunb.			KEN; LSO; MOZ; MWI; SWZ; TZA; ZAF; ZMB; ZWE		MWI (1)
V. capitata Link	RUS	KAZ; MNG; RUS		CAN; USA
V. cardamines M.Bieb.	RUS	ARM; AZE; GEO
V. carnosa Sm.				ARG; CHL	CHL (1)
V. castellanosii Borsini				ARG; BOL; CHL
V. catharinensis Graebn.				BRA
V. celtica L.	AUT; CHE; FRA; ITA				AUT (2)
V. cephalantha Schltdl.				BOL; PER
V. ceratophylla Kunth				MEX
V. cernua B.Eriksen				ECU
V. cerosifolia Xena				VEN
V. chaerophylloides Sm.				COL; ECU; PAN; PER
V. chamaedryfolia Cham. & Schltdl.				BRA
V. chiapensis Barrie				MEX
V. chilensis Borsini				ARG; CHL
V. chionophila Popov & Kult.		KAZ; KGZ; TJK; TKM; UZB
V. clarionifolia Phil.				ARG; CHL
V. clarkei Briq.		AFG; IND; IRN; PAK
V. clematitis Kunth				ARG; BOL; COL; ECU; GTM; HND; MEX; PAN; PER; VEN
V. coarctata Ruiz & Pav.				BOL; PER
V. colchica Utkin	RUS	ARM; AZE; GEO			GEO (2)
V. coleophylla Diels				ECU
V. columbiana Piper				USA
V. comosa B.Eriksen				PER
V. condamoana Graebn.				ARG; PER
V. connata Ruiz & Pav.				PER
V. convallarioides (Schmale) B.B.Larsen				ECU; PER
V. corymbulosa (Wedd.) Cabrera				ARG; BOL
V. corynodes Borsini				ARG
V. costata Schmale				PER
V. crassifolia Kunth				COL; ECU; PER
V. crassipes (Wedd.) Höck				BOL; PER
V. crinii Orph. ex Boiss.	ALB; GRC
V. crispa Ruiz & Pav.				ARG; CHL	CHL (2)
V. cuatrecasasii F.G.Mey.				COL
V. cucurbitifolia Standl.				MEX
V. cumbemayensis B.Eriksen				PER
V. cyclophylla Graebn.				MEX
V. dacica Porcius	CZE; POL; ROU; SVK; UKR
V. daghestanica Rupr. ex Boiss.	RUS	ARM; AZE; GEO
V. daphniflora Hand.-Mazz.		CHN
V. davyana (Jeps.) Christenh. & Byng				USA
V. decussata Ruiz & Pav.				BOL; ECU; PER
V. deltoidea F.G.Mey.				GTM; MEX
V. densa (Wedd.) Höck				BOL
V. densiflora Benth.				MEX
V. descolei Borsini				ARG
V. dinorrhiza (Griseb.) Höck				ARG
V. dioica L.	AUT; BEL; BGR; BIH; BLR; CHE; CZE; DEN; DEU; ESP; EST; FRA; GBR; HRV; HUN; ITA; LTU; LVA; MKD; MNE; NLD; NOR; POL; PRT; RUS; SVK; SVN; SWE; TUR; UKR	TUR		CAN; USA	GBR (2); SVK (1)
V. dipsacoides Graebn.				PER
V. domingensis Urb.				DOM; HTI
V. dorotheae (Weberling) Christenh. & Byng				PER
V. dubia Bunge		IND; KAZ; MNG; PAK; RUS			KGZ (1); RUS (1)
V. edulis Nutt.				CAN; MEX; USA	unknown (3)
V. effusa Griseb.				ARG; BOL
V. eichleriana (C.A.Müll.) Graebn.				BRA
V. elongata Jacq.	AUT; BIH; HRV; ITA; MKD; MNE; SRB; SVN				AUT (1)
V. emmanuelii Rzed. & Calderón				MEX
V. engleriana Höck				COL
V. erikae (Graebn.) Christenh. & Byng				PER
V. eriophylla (Ledeb.) Utkin		ARM; AZE; GEO			GEO (1)
V. erotica Christenh. & Byng		ARM; AZE; GEO; IRQ; ISR; JOR; LBN; SYR; TUR			GEO (1); ISR (1); LBN (1)
V. eupatoria Sobral				BRA
V. excelsa Poir.	ALB; AUT; BEL; BGR; BIH; CHE; CZE; DEN; DEU; ESP; EST; FIN; FRA; GBR; HRV; HUN; IRL; ISL; ITA; LTU; LVA; MKD; MNE; NOR; POL; PRT; ROU; RUS; SRB; SVN; SVK; SWE; UKR				DEU (1); SVK (1)
V. fauriei Briq.		CHN; JAP; KOR; PRK; RUS; TWN
V. ferax (Griseb.) Höck				ARG
V. ficariifolia Boiss.		AFG; CHN; IND; IRN; KAZ; KGZ; PAK; TJK; TKM; UZB			KGZ (1)
V. flaccidissima Maxim.		CHN; JPN; TWN
V. flagellifera Batalin		CHN
V. fonkii Phil.				ARG; CHL
V. fragilis Clos				CHL
V. gaimanensis N.Nagah.				ARG
V. galeottiana M.Martens				MEX
V. gallinae Barrie				MEX
V. gibbosa (Suksd.) Christenh. & Byng				USA
V. gilgiana Graebn.				BRA
V. glaziovii Taub.				BRA
V. glechomifolia F.G.Mey.				BRA
V. globiflora Ruiz & Pav.				PER
V. globularioides Graebn.				PER
V. globularis A.Gray				PER
V. graciliflora (Fisch. & C.A.Mey.) Byng & Christenh.	GRC; ITA		DZA; LBY; TUN
V. gracilipes Clos				CHL
V. granataea Xena				VEN
V. grandifolia Phil.				CHL
V. grisiana Wedd.				PER
V. grossheimii Vorosch.	RUS; UKR	ARM; AZE; GEO
V. hadros Graebn.				PER
V. hardwickei Wall.		BTN; CHN; IDN; IND; LAO; MMR; NPL; PAK; THA; VNM
V. hebecarpa DC.				ARG; CHL	CHL (1)
V. hengduanensis D.Y.Hong		CHN
V. henrici (Graebn.) B.Eriksen				ECU; PER
V. herrerae Killip				PER
V. heterocarpa (Pomel) Christenh. & Byng			DZA; MAR
V. hiemalis Graebn.		CHN
V. himachalensis V.Prakash & Mehrotra		IND; PAK
V. himalayana Grubov		BTN; CHN; IND; MMR; NPL; PAK
V. hirsuta (Emb. & Maire) Christenh. & Byng			MAR
V. hirtella Kunth				ECU; PER
V. hirticalyx L.C.Chiu		CHN
V. hookeriana Wight & Arn.		IND
V. hornschuchiana Walp.				ARG; CHL
V. hsui M.J.Jung		TWN
V. humahuacensis Borsini				ARG
V. humboldtii Hook. & Arn.				ECU; PER
V. hunzikeri Borsini				ARG
V. hyalinorrhiza Ruiz & Pav.				BOL; CHL
V. iganciana C.Rabuske & J.Külkamp				BRA
V. imbricata Killip				ECU; PER
V. inconspicua (Wedd.) Höck				BOL
V. interrupta Ruiz & Pav.				CHL; ECU; PER
V. isoetifolia Killip				PER
V. italica Lam.	ALB; BGR; BIH; CYP; GRC; HRV; ITA; MKD; MNE; SRB; SVN; TUR	ISR; JOR; LBN; SYR; TUR			ISR (16)
V. jaeschkei C.B.Clarke		IND; PAK
V. jasminoides Briq.				BOL; PER
V. jatamansi Jones ex Roxb.		AFG; BTN; CHN; IND; MMR; NPL; PAK; THA; VNM
V. jelenevskyi P.A.Smirn.	RUS	ARM; AZE; GEO
V. johannae Weberling				BOL; PER
V. juncea (Boiss. & Heldr.) Christenh. & Byng	ALB; GRC
V. kamelinii Sharipova		TJK
V. karstenii Briq.				COL
V. kassarica Kharadze & Kapeller	RUS	ARM; AZE; GEO
V. kawakamii Hayata		TWN
V. kellereri (Stoj., Stef. & T.Georgiev) Christenh. & Byng	BGR
V. kilimandscharica Engl.			KEN; TZA; UGA
V. kurtziana Borsini				ARG; BRA
V. laciniosa M.Martens & Galeotti				MEX
V. lancifolia Hand.-Mazz.		CHN
V. lapathifolia Vahl				ARG; CHL	CHL (2)
V. lasiocarpa Griseb.				ARG
V. laxissima Standl. & L.O.Williams				CRI; PAN
V. lecoqii (Jord.) Christenh. & Byng	ESP; FRA				ESP (1)
V. ledoides Graebn.				PER
V. lepidota Clos				CHL
V. leptothyrsos Graebn.				BOL
V. leschenaultii DC.		IND
V. leucocarpa DC.				ARG; CHL	CHL (1)
V. leucophaea DC.		ARM; AZE; GEO; IRN; TUR
V. longiflora Willk.	ESP
V. longitubulosa (Schmale) B.Eriksen				PER
V. lyrata Vahl				PER
V. macbridei Killip				BOL; PER
V. macropoda Greenm.		LAO
V. macrorhiza Poepp. ex DC.				ARG; CHL
V. macrosiphon (Boiss.) E.Vilm.	ESP		DZA; MAR
V. maipoana Ravenna				CHL
V. malvacea Graebn.				PER
V. mandoniana (Wedd.) Höck				BOL
V. mandonii Britton				BOL; PER
V. mapirensis (Britton) Weberling				BOL
V. maroccana (Rouy) Christenh. & Byng			DZA; MAR
V. martjanovii Krylov		CHN; IRN; KAZ; MNG; RUS; TJK
V. meonantha C.Y.Cheng & H.B.Chen		CHN
V. merxmuelleri W.Seitz				PER
V. microphylla Kunth				COL; ECU; PER
V. micropterina Wedd.				BOL; PER
V. minor (Hook.) Byng & Christenh.				USA
V. minutiflora Hand.-Mazz.		CHN
V. montana L.	ALB; AUT; BGR; BIH; CHE; CZE; DEU; ESP; FRA; GRC; HRV; ITA; MKD; MNE; PRT; ROU; SRB; SVN; SVK				AUT (3); FRA (1); ITA (2)
V. moonii Arn. ex C.B.Clarke		IND; LKA
V. moorei Barrie				MEX
V. moyanoi Speg.				ARG
V. muelleri Graebn.				BRA
V. munozii Borsini				ARG
V. murrayi Krasnob. & Berkut.		RUS
V. mussooriensis V.Prakash, Aswal & Mehrotra		IND; PAK
V. nahuelbutae Penneck.				CHL
V. naidae Barrie				MEX
V. neglecta R.Bernal				COL
V. nelsonii Greenm.				MEX
V. nevadensis (Boiss.) Christenh. & Byng	ESP		MAR
V. nigricans Graebn.				PER
V. niphobia Briq.				BOL; ECU; PER
V. nivalis Wedd.				ARG; BOL; CHL; PER
V. oaxacana Barrie				MEX
V. oblongifolia Ruiz & Pav.				BOL; PER
V. obtusifolia DC.				CHL	CHL (1)
V. occidentalis A.Heller				USA
V. officinalis L.	ALB; AUT; BEL; BGR; BIH; BLR; CHE; CZE; DEU; DNK; ESP; EST; FIN; FRA; GBR; GRC; HRV; HUN; ITA; LTU; LUX; LVA; MDA; MKD; MLT; MNE; NLD; NOR; POL; PRT; ROU; RUS; SRB; SVK; SVN; SWE; TUR; UKR	ARM; AZE; GEO; IRN; TUR			AUT (2); BGR (1); CZE (1); DEU (32); ESP (1); GBR (2); HRV (15); HUN (3); MNG (1); POL (22); RUS (1); SWE (43); UKR (3); USA (1); unknown (1)
V. olenaea Boiss. & Heldr.	GRC
V. oligantha Boiss. & Heldr.		TUR
V. orbiculata Sm.	CYP
V. organensis (C.A.Müll.) Gardner				BRA
V. otomiana Barrie				MEX
V. pallescens (Maire) Byng & Christenh.			MAR
V. palmatiloba F.G.Mey.				MEX
V. palmeri A.Gray				CRI; GTM; HND; MEX; NIC; SLV
V. paniculata Ruiz & Pav.				BOL; PER
V. papilla Bertero ex DC.				CHL	CHL (1)
V. pardoana Graebn.				PER
V. parvula Killip				BOL; PER
V. pauciflora Michx.				USA	USA (1)
V. paucijuga Sumnev.		RUS
V. paulae (Graebn.) Christenh. & Byng				CHL; PER
V. peltata Clos				CHL	CHL (1)
V. pennellii Killip				PER
V. petersenii Weberling & Reese-Krug				BOL; CHL; PER
V. philippiana Briq.				ARG; CHL
V. phitosiana Quézel & Contandr.	GRC
V. phu L.		TUR
V. phylicoides (Turcz.) Briq.				VEN
V. pilosa Ruiz & Pav.				COL; ECU; PER; VEN
V. pinnatifida Ruiz & Pav.				PER
V. plateadensis Á.J.Pérez, C.H.Perss. & J.N.Zapata				ECU
V. plectritoides Graebn.				PER
V. polemonifolia Phil.				ARG; CHL
V. polybotrya (Griseb.) Höck				ARG
V. polyclada Briq.				BOL
V. polystachya Sm.				ARG; BRA; URY
V. potopensis Briq.				BOL
V. praecipitis A.E.Villarroel & Menegoz				CHL
V. pratensis Dierb.	AUT; DEU; FRA
V. prionophylla Standl.				CRI; GTM; MEX; PAN
V. protenta B.Eriksen				ECU; PER
V. psychrophila Briq.				BOL
V. pulchella M.Martens & Galeotti				CRI; GTM; MEX; PAN
V. pulvinata (Rauh & Willer) Christenh. & Byng				PER
V. punctata F.G.Mey.				ECU; PER
V. pycnantha A.Gray				ARG; BOL; CHL; PER
V. pyramidalis Kunth				BOL; ECU; PER
V. pyrenaica L.	ESP; FRA				ESP (2)
V. pyricarpa Borsini				ARG; BOL
V. pyrolifolia Decne.		IND; PAK
V. quadrangularis Kunth				ECU; PER
V. quindiensis Killip				COL
V. quirorana Xena				VEN
V. radicalis Clos				CHL
V. radicata Graebn.				PER
V. reitziana Borsini				BRA
V. renifolia Killip				PER
V. reverdattoana Sumnev.		TKM
V. rhizantha A.Gray				BOL; PER
V. rigida Ruiz & Pav.				BOL; COL; ECU; PER
V. robertianifolia Briq.				CRI; GTM; HND; MEX; PAN
V. rosaliana F.G.Mey.				VEN
V. rossica P.A.Smirn.	RUS; UKR	KAZ; RUS
V. roylei Klotzsch		IND; PAK
V. rubra L.	ALB; BIH; ESP; FRA; GRC; HRV; ITA;MKD; MNE; PRT; SRB; SVN; TUR		DZA; MAR; TUN		BEL (1); LBN (1); USA (1)
V. rudychazaroi Cházaro, Franc.Gut. & J.R.Carral				MEX
V. rufescens Killip				PER
V. ruizlealii Borsini				ARG
V. rumicoides Wedd.				COL; ECU; PER
V. rusbyi Britton				BOL
V. rzedowskiorum Barrie				MEX
V. salicariifolia Vahl				ARG; BRA; PRY; URY
V. saliunca All.	AUT; CHE; FRA; ITA				FRA (1)
V. saxatilis L.	ALB; AUT; BIH; CHE; DEU; HRV; ITA; MKD; MNE; SRB; SVN				AUT (1); ITA (2)
V. saxicola C.A.Mey.	RUS	ARM; AZE; GEO; TUR
V. scandens L.				ARG; BOL; BRA; COL; CRI; CUB; DOM; GTM; HTI; MEX; NIC; PAN; PRY; PER; PRI; SLV; URY; USA; VEN
V. schachristanica Kamelin & B.A.Sharipova		TJK
V. scouleri Rydb.				CAN; USA
V. secunda B.Eriksen				COL; ECU
V. sedifolia d'Urv.				ARG; CHL; FLK
V. selerorum Graebn. & Loes.				MEX
V. senecioides Phil.				CHL	CHL (1)
V. serrata Ruiz & Pav.				PER
V. serratifolia J.M.Acosta, L.Salomón & C.A.Zanotti				ARG
V. sibthorpii (Heldr. & Sartori ex Boiss.) Christenh. & Byng	ALB; BIH; GRC; HRV; MKD; MNE; SRB; SVN
V. sichuanica D.Y.Hong		CHN
V. sieberi (Heldr.) Christenh. & Byng	GRC
V. sisymbriifolia Vahl		AFG; ARM; AZE; GEO; IRN; IRQ; TKM; TUR
V. sitchensis Bong.				CAN; USA	CAN (1); USA (3); unknown (2)
V. siyuaniana S.S.Ying		TWN
V. smithii Killip				COL
V. sobraliana Rabuske & Iganci				BRA
V. sorbifolia Kunth				BOL; COL; CRI; ECU; SLV; GTM; HND; MEX; NIC; USA; VEN
V. spathulata Ruiz & Pav.				PER
V. speluncaria Boiss.		TUR
V. sphaerocarpa Phil.				CHL
V. sphaerocephala Graebn.				PER
V. sphaerophora Graebn.				PER
V. spicata (Turcz.) Briq.				COL; VEN
V. spiroflora B.B.Larsen				COL
V. stenophylla Killip				COL
V. stenoptera Diels		CHN
V. stolonifera Czern.	ALB; AUT; BEL; BGR; BIH; CHE; CZE; DEN; DEU; ESP; EST; FRA; GBR; GRC; HRV; HUN; IRL; ISL; ITA; LTU; LUX; LVA; MKD; MNE; NOR; POL; PRT; ROU; SRB; SVK; SVN; UKR				SVK (1); UKR (1)
V. stracheyi C.B.Clarke		AFG; IND; NPL; PAK
V. stricta Clos				ARG; CHL	CHL (3)
V. stuckertii Briq.				ARG
V. sulcata (Pomel) Christenh. & Byng			DZA
V. supina Ard.	AUT; BIH; CHE; DEU; HRV; ITA; MKD; MNE; SRB; SVN				AUT (1)
V. tachirensis Xena				VEN
V. tafiensis Borsini				ARG; BOL
V. taiwaniana S.S.Ying		TWN
V. tajuvensis Sobral				BRA
V. tanacetifolia F.G.Mey.				MEX
V. tangutica Batalin		CHN; MNG
V. tatamana Killip				COL; ECU
V. tessendorffiana Graebn.				PER
V. texana Steyerm.				USA
V. theodorici (Weberling) B.Eriksen				PER
V. tiliifolia Troickij	RUS	ARM; AZE; GEO
V. tomentosa Kunth				ECU; PER
V. transjenisensis Kreyer		MNG; RUS
V. trichomanes Graebn.				PER
V. trichostoma Hand.-Mazz.		CHN
V. trinervis Viv.	FRA
V. tripartita (Gamisans) J.-M.Tison	FRA
V. triphylla Kunth				COL; VEN
V. triplinervis (Turcz.) Briq.				VEN
V. tripteris L.	AUT; BGR; BIH; CHE; CZE; DEU; ESP; FRA; GRC; HRV; HUN; ITA; MKD; MNE; POL; ROU; SRB; SVK; SVN; UKR				AUT (1); ITA (1)
V. tuberifera Graebn.				BOL
V. tuberosa L.	ALB; BGR; BIH; ESP; FRA; GRC; HRV; ITA; MKD; MNE; PRT; RUS; SRB; SVN; UKR	ARM; AZE; GEO; KAZ; RUS; TUR	DZA; MAR; TUN
V. tucumana Borsini				ARG
V. tunuyanense Méndez				ARG
V. turkestanica Sumnev.		CHN; KGZ
V. tzotziliana Barrie				MEX
V. ulei Graebn.				BRA
V. uliginosa (Torr. & A.Gray) Rydb.				CAN; USA
V. urbani Phil.				ARG; CHL
V. urticifolia Kunth				BOL; COL; CRI; ECU; GTM; HND; MEX; NIC; PAN; PER; SLV
V. vaga Clos				CHL
V. vaginata Kunth				MEX
V. valdiviana Phil.				CHL
V. velutina Clos				CHL
V. venezuelana Briq.				VEN
V. verrucosa Schmale				PER
V. verticillata Clos				CHL
V. vetasana Killip				COL
V. vilcabambensis Sylvester & Barrie				PER
V. virescens Clos				ARG; CHL
V. virgata Ruiz & Pav.				PER
V. volkensii Engl.			COD; KEN; TZA; UGA
V. wandae (Graebn. & Tessend.) Christenh. & Byng				ARG; BOL; ECU; PER
V. warburgii Graebn.				BOL; PER
V. weberbaueri Graebn.				PER
V. weddelliana Rouy				BOL
V. wolgensis Kazak.	RUS	RUS
V. xenophylloides Sklenář & B.Eriksen				ECU
V. yacuriensis Sklenář & B.Eriksen				ECU
V. zamoranensis Rzed. & Calderón				MEX
V. zapotecana Barrie				MEX
V. × aurigerana (Giraudias) Christenh. & Byng	ESP; FRA
V. × braunii-blanquetii Lakušić	BIH; HRV; MKD; MNE; SRB; SVN
V. × ekmanii F.G.Mey.				DOM; HTI
V. × gesneri Brügger	FRA
V. × gillotii (Giraudias) ined.	FRA
